# Supplementary material for: Trimethyl-palladium(IV) and -platinum(IV) complexes containing phosphine donor ligands, including studies of 1,5,9-triethyl-1,5,9-triphosphacyclodecane and X-ray structural studies of palladium(II) and palladium(IV) complexes †
Source: Royal Society of Chemistry journal article supplement (doi:10.1039/b004741o), 2000-01-01
Supplement: b004741o.doc [file b004741o.doc]

Supplementary material:

NMR Spectra of Palladium(IV) and Palladium(II) Complexes

[PdMe3(2,2'-bipy)(PPh3)][O3SCF3] 1. 1H NMR (acetone-*d*6, -20 ˚C):  8.78 (m, 2H, H6-bipy), 8.59 (m, 2H, H3-bipy), 8.29 (m, 2H, H4-bipy), 7.79 (m, 2H, H5-bipy), 7.45 (m, 3H, Ph), 7.32 (m, 6H, Ph), 7.05 (m, 6H, Ph), 1.79 (d, 3*J*(HP) = 8.4 Hz, 6H, PdCH3), 1.17 (d, 3*J*(HP) = 8.0 Hz, 3H, PdCH3). 31P{1H} NMR (acetone-*d*6, -20 ˚C):  = 9.1.

[PdMe(2,2'-bipy)(PPh3)][O3SCF3] 1a: 1H NMR (acetone-*d*6): very broad resonances for 2,2'-bipy,  7.86 (m, 6H, Ph), 7.67 (m, 3H, Ph), 7.60 (m, 6H, Ph), 0.85 (s, 3H, PdCH3). 31P{1H} NMR (acetone-*d*6):  40.7.

[PdMe3(2,2'-bipy)(PMePh2)][O3SCF3] 2. 1H NMR (acetone-*d*6, -40 ˚C):  8.93 (m, 2H, H6-bipy), 8.54 (m, 2H, H3-bipy), 8.30 (m, 2H, H4-bipy), 7.86 (m, 2H, H5-bipy), 7.38 (m, 2H, Ph), 7.26 (m, 4H, Ph), 7.10 (m, 4H, Ph), 1.82 (d, 2*J*(HP) = 7.6 Hz, 3H, PCH3), 1.62 (d, 3*J*(HP) = 8.4 Hz, 6H, PCH3), 0.97 (d, 3*J*(HP) = 8.8 Hz, 3H, PdCH3). 31P{1H} NMR (acetone-*d*6, -40 ˚C):  = -5.5.

[PdMe(2,2'-bipy)(PMePh2)][O3SCF3] 2a: 1H NMR (acetone-*d*6): very broad resonances for 2,2'-bipy,  7.86 (m, 4H, Ph), 7.60 (m, 6H, Ph), 2.38 (d, 2*J*(HP) = 10.0 Hz, 3H PCH3) 0.91 (d, 3*J*(HP) = 2.8 Hz, 3H, PdCH3). 31P{1H} NMR (acetone-*d*6):  25.4.

[PdMe3(2,2'-bipy)(PMe2Ph)][O3SCF3] 3. 1H NMR (acetone-*d*6, 0 ˚C):  8.75 (m, 2H, H6-bipy), 8.60 (m, 2H, H3-bipy), 8.30 (m, 2H, H4-bipy), 7.81 (m, 2H, H5-bipy), 7.24 (m, 1H, Ph), 7.09 (m, 2H, Ph), 6.82 (m, 2H, Ph), 1.53 (d, 3*J*(HP) = 8.8 Hz, 6H, PdCH3), 1.49 (d, *2J*(HP) = 8.4 Hz, 6H, PCH3), 0.79 (d, 3*J*(HP) = 8.8 Hz, 3H, PdCH3). 31P{1H} NMR (acetone-*d*6, 0 ˚C):  = -11.3.

[PdMe(2,2'-bipy)(PMe2Ph)][O3SCF3] 3a. 1H NMR (CDCl3, -30 ˚C): 8.64 (m, 1H, H6A-bipy), 8.62 (m, 1H, H3A-bipy), 8.55 (m, 1H, H3B-bipy), 8.28 (m, 1H, H4A-bipy), 8.08 (m, 1H, H4B-bipy), 7.81 (m, 2H, Ph), 7.71 (m, 1H, H5A-bipy), 7.55 (m, 3H, Ph), 7.37 (m, 1H, H6B-bipy), 7.20 (m, 1H, H5B-bipy), 1.89 (d, 2*J*(HP) = 10.0 Hz, 6H, PCH3), 0.91 (d, 3*J*(HP) = 3.2 Hz, 3H, PdCH3). 31P{1H} NMR (CDCl3, -30 ˚C):  = 10.5.

[PdMe3(2,2'-bipy)(PCy3)][O3SCF3] 4. 1H NMR (acetone-*d*6, -40 ˚C): 9.16 (m, 2H, H6-bipy), 8.95 (m, 2H, H3-bipy), 8.46 (m, 2H, H4-bipy), 8.06 (m, 2H, H5-bipy), 1.7-1.0 (m, broad, 33H Cy), 1.70 (d, 3*J*(1H,31P) = 7.2 Hz, 6H, PCH3), 0.95 (d, 3*J*(1H,31P) = 7.6 Hz, 3H, PdCH3). 31P{1H} NMR (acetone-*d*6, -40 ˚C): = 1.5.

[PdMe(2,2'-bipy)(PCy3)][O3SCF3] 4a: 1H NMR (acetone-*d*6): very broad resonances, could not be assigned. 31P{1H} NMR (acetone-*d*6): 28.9.

[PdMe3(2,2'-bipy){P(OMe)3}][O3SCF3] 5. 1H NMR (acetone-*d*6, -40 ˚C): 9.01 (m, 2H, H6-bipy), 8.90 (m, 2H, H3-bipy), 8.47 (m, 2H, H4-bipy), 7.98 (m, 2H, H5-bipy), 3.46 (d, 3*J*(HP) = 9.6 Hz, 9H, POCH3), 1.64 (d, 3*J*(HP) = 10.4 Hz, 6H, PCH3), 0.80 (d, 3*J*(HP) = 13.6 Hz, 3H, PdCH3). 31P{1H} NMR (acetone, -40 ˚C): = 112.8.

[PdMe(2,2'-bipy){P(OMe)3}][O3SCF3] 5a: 1H NMR (acetone-*d*6): very broad resonances for 2,2'-bipy, 3.93 (d, 3*J*(HP) = 13.2 Hz, 9H POCH3) 1.02 (s, 3H, PdCH3). 31P{1H} NMR (acetone-*d*6): 122.9.

[PdMe3(phen)(PMe2Ph)][O3SCF3] 6. 1H NMR (acetone-*d*6, -30 ˚C):  9.19 (d, 3*J*(HH) = 4.8 Hz, 2H, H2-phen), 8.89 (d, 3*J*(HH) = 8.0 Hz, 2H, H4-phen), 8.23 (s, 2H, H5-phen), 8.17 (dd, 3*J*(HH) = 8.0, 4.8 Hz, 2H, H3-phen), 6.92 (m, 1H, Ph), 6.71 (m, 2H, Ph), 6.41 (m, 2H, Ph), 1.67 (d, 3*J*(HP) = 8.8 Hz, 6H, PdCH3), 1.51 (d, 2*J*(HP) = 9.2 Hz, 6H, PCH3), 0.83 (d, 3*J*(HP) = 8.8 Hz, 3H, PdCH3). 31P{1H} NMR (acetone-*d*6, -30 ˚C):  = -10.6.

[PdMe(phen)(PMe2Ph)][O3SCF3] 6a: 1H NMR (acetone-*d*6, 20 ˚C): very broad resonances for phen, 8.10 (m, 2H, Ph), 7.61 (m, 3H, Ph), 2.11 (d, 2*J*(HP) = 10.4 Hz, 6H, PCH3), 1.14 (d, 3*J*(HP) = 2.9 Hz, 3H, PdCH3). 31P{1H} NMR (acetone-*d*6, 20 ˚C): = 10.4.

[PdMe3(tmen)(PMe2Ph)][O3SCF3] 7. 1H NMR (acetone-*d*6, -60 ˚C): 7.66 (m, 1H, Ph), 7.51 (m, 2H, Ph), 7.37 (m, 2H, Ph), 2.92 (broad, 2H, NCH2), 2.79 (broad, 2H, NCH2), 2.72 (s, 6H, NCH3), 2.39 (s, 6H, NCH3), 1.89 (d, 3*J*(HP) = 6.4 Hz, 6H, PdCH3), 1.30 (d, 3*J*(HP) = 6.8 Hz, 3H, PdCH3), 1.01 (d, 2*J*(HP) = 9.2 Hz, 3H, PCH3). 31P{1H} NMR (acetone-*d*6, -60 ˚C): -17.2.

[PdMe(tmen)(PMe2Ph)][O3SCF3] 7a: 1H NMR (acetone-*d*6, 0 ˚C): 7.92 (m, 2H, Ph), 7.56 (m, 3H, Ph), 2.95 (broad, 2H, NCH2), 2.81 (broad, 2H, NCH2), 2.66 (d, 4*J*(HP) = 2.0 Hz, 6H, NCH3), 2.49 (s, 6H, NCH3), 1.83 (d, 2*J*(HP) = 10.0 Hz, 6H, PCH3), 0.31 (d, 3*J*(HP) = 3.6 Hz, 3H, PdCH3). 31P{1H} NMR (acetone-*d*6, 0 ˚C): 8.0.

[PtMe3(2,2'-bipy)(PMePh2)][O3SCF3] 9. 1H NMR (acetone-*d*6): 8.77 (m, 2H, H6), 8.66 (m, 2H, H3), 8.35 (m, 2H, H4), 7.83 (m, 2H, H5), 7.40 (m, 2H, Ph), 7.30 (m, 4H, Ph), 7.17 (m, 4H, Ph), 1.88 (d, 2*J*(HP) = 8.4 Hz, 3*J*(HPt) = 11.2 Hz, 3H, PCH3), 1.20 (d, 3*J*(HP) = 8.4 Hz, 2*J*(HPt) = 67.6 Hz, 6H, PtCH3), 0.43 (d, 3*J*(HP) = 7.6 Hz, 2*J*(HPt) = 58.0 Hz, 3H, PtCH3). 31P{1H} NMR (acetone-*d*6): = -15.1 (1*J*(HPt) = 1082.6 Hz).

[PtMe3(2,2'-bipy)(PMe2Ph)][O3SCF3] 10. 1H NMR (acetone-*d*6):  8.74 (m, 2H, H6), 8.67 (m, 2H, H3), 8.35 (m, 2H, H4), 7.83 (m, 2H, H5), 7.25 (m, 1H, Ph), 7.13 (m, 2H, Ph), 6.89 (m, 2H, Ph), 1.61 (d, *2J*(HP) = 9.6 Hz, 3*J*(HPt) = 12.0 Hz, 6H, PCH3), 1.09 (d, 3*J*(HP) = 8.0 Hz, 2*J*(HPt) = 68.0 Hz, 6H, PtCH3), 0.29 (d, 3*J*(HP) = 8.0 Hz, 2*J*(HPt) = 56.0 Hz, 3H, PtCH3). 31P{1H} NMR (acetone-*d*6):  = -22.6 (1*J*(HPt) = 1172.6 Hz).

[{PdMe3(2,2'-bipy)}2(depe)][O3SCF3]2 11. 1H NMR (acetone-*d*6, -40 ˚C): 9.06 (m, 2H, H6-bipy), 8.93 (m, 2H, H3-bipy), 8.46 (m, 2H, H4-bipy), 7.98 (m, 2H, H5-bipy), 1.52 (d, 3*J*(HP) = 8.0 Hz, 6H, PCH3), 1.44 (m, 6H. PCH2), 0.76 (d, 3*J*(HP) = 8.4 Hz, 3H, PdCH3), 0.64 (dt, 3*J*(HP) = 14.0 Hz, 3*J*(HH) = 7.6 Hz). 31P{1H} NMR (acetone-*d*6, -40 ˚C): = -3.3.
